# Supplementary material for: Synergistic integration of PdCu alloy on TiO2 for efficient photocatalytic CO2 reduction to CH4 with H2O
Source: Royal Society of Chemistry journal article supplement (doi:10.1039/d4ta04354e), 2024-01-01
Supplement: d4ta04354e1.pdf [file d4ta04354e1.pdf]

## Supporting Information

### Synergistic integration of PdCu alloy on TiO<sub>2</sub> for efficient photocatalytic CO<sub>2</sub> reduction to CH<sub>4</sub> with H<sub>2</sub>O

Yang Liu,<sup>a</sup> Shujuan Sun,<sup>b</sup> Meng Ma,<sup>b</sup> Xinyu Zhong,<sup>a</sup> Fengyu Gao,<sup>c\*</sup> Guangtong Hai,<sup>d\*</sup> Xiubing Huang<sup>\*a</sup>

<sup>a</sup> Beijing Key Laboratory of Function Materials for Molecule & Structure Construction, School of Materials Science and Engineering, University of Science and Technology Beijing, Beijing 10083, PR China

<sup>b</sup> State Power Investment Corporation Central Research Institute (SPICRI), Beijing, 100029, PR China

<sup>c</sup> School of Energy and Environmental Engineering, University of Science and Technology Beijing, Beijing 100083, PR China

<sup>d</sup> Institute of Zhejiang University-Quzhou, Zhejiang University, 99 Zheda Road, Quzhou, Zhejiang Province 324000, P. R. China

**Corresponding authors:** [ahnuhkgao@163.com](mailto:ahnuhkgao@163.com) (F. Gao), [hgt.2021@tsinghua.org.cn](mailto:hgt.2021@tsinghua.org.cn) (G. Hai), [xiubinghuang@ustb.edu.cn](mailto:xiubinghuang@ustb.edu.cn) (X. Huang)

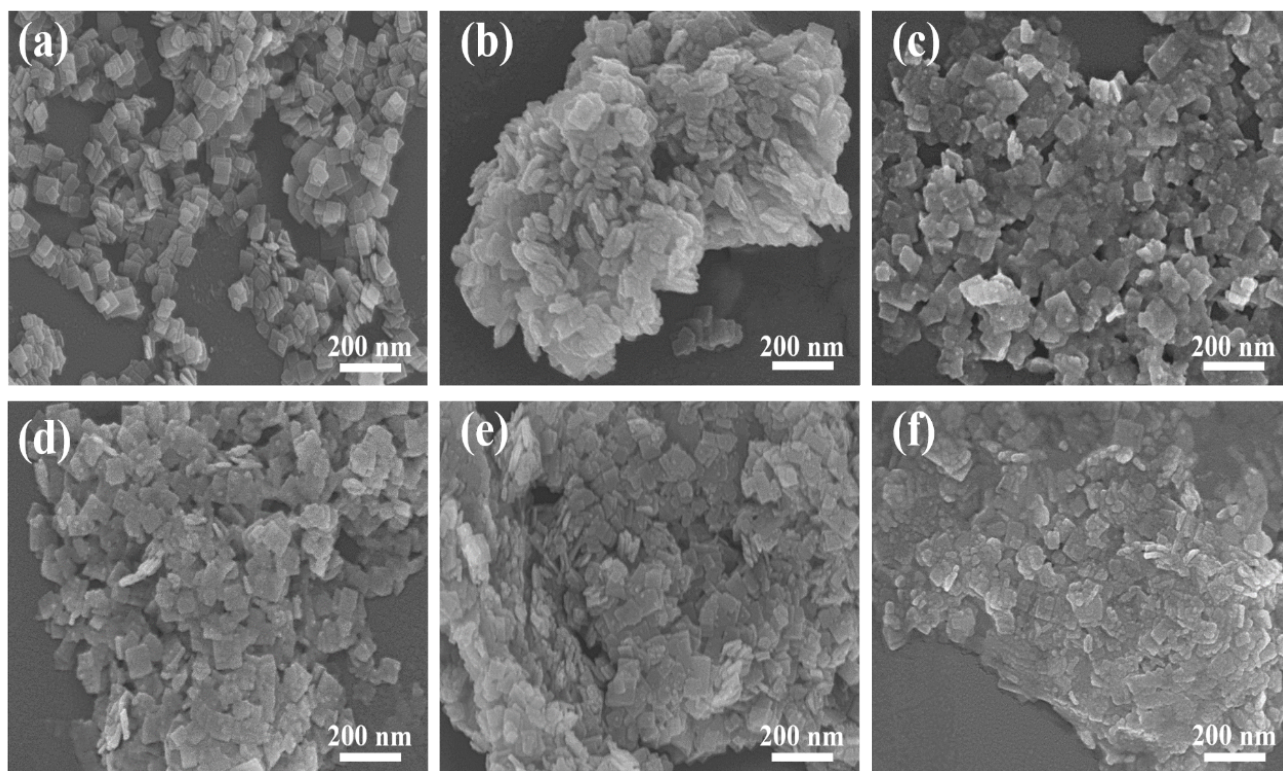

**Figure S1.** SEM image of the sample (a) TiO<sub>2</sub> NS; (b) Cu-TiO<sub>2</sub> NS; (c) Pd-TiO<sub>2</sub> NS; (d) (PdCu)<sub>1</sub>-TiO<sub>2</sub> NS; (e) (PdCu)<sub>2</sub>-TiO<sub>2</sub> NS; (f) (PdCu)<sub>3</sub>-TiO<sub>2</sub> NS.

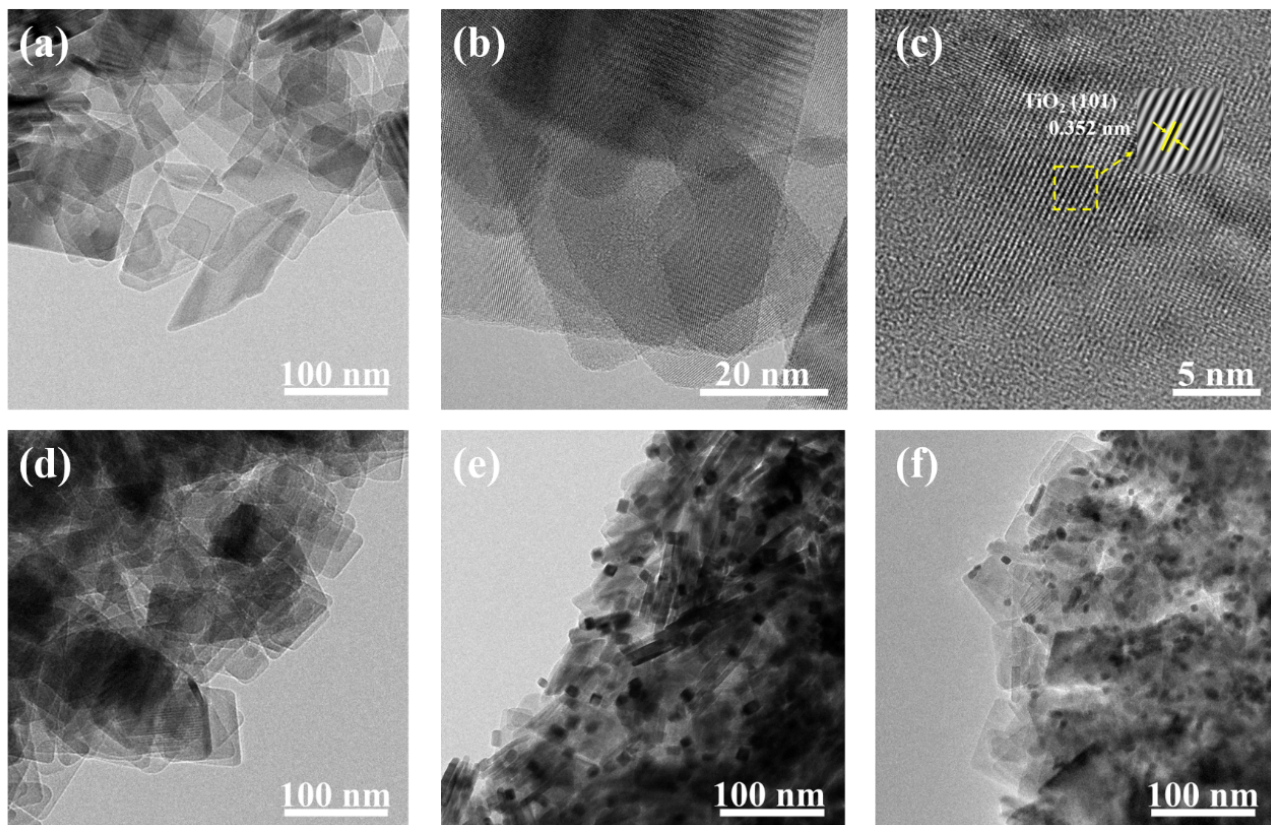

**Figure S2.** (a, b) Low magnification TEM images of TiO<sub>2</sub> NS; (c) HR-TEM images of TiO<sub>2</sub> NS; low magnification TEM images of some composites (d) Cu-TiO<sub>2</sub> NS; (e) Pd-TiO<sub>2</sub> NS; (f) (PdCu)<sub>2</sub>-TiO<sub>2</sub> NS.

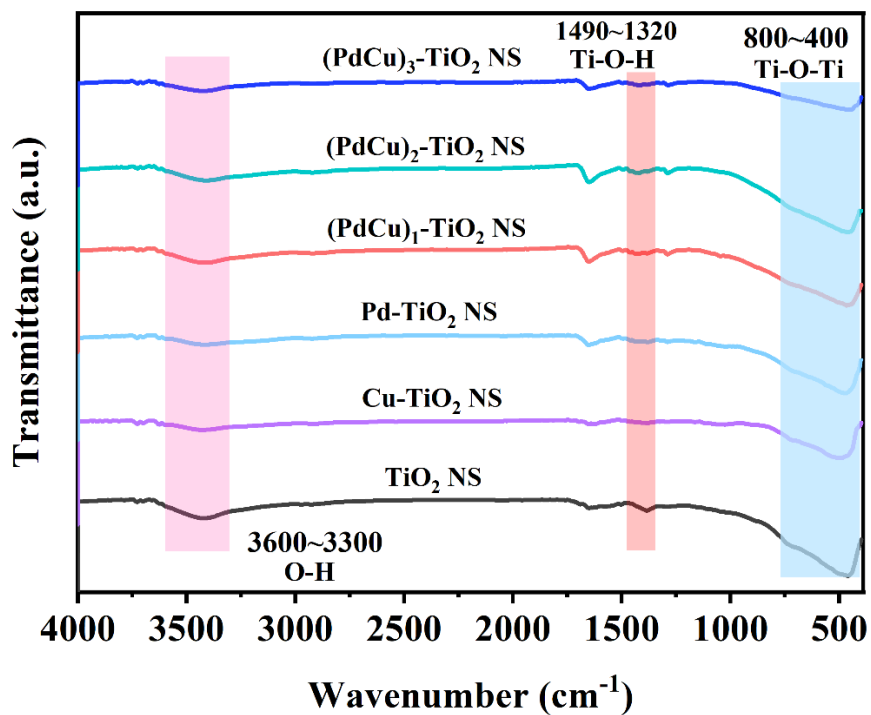

Figure S3. FTIR spectra of TiO<sub>2</sub> NS and its composite materials.

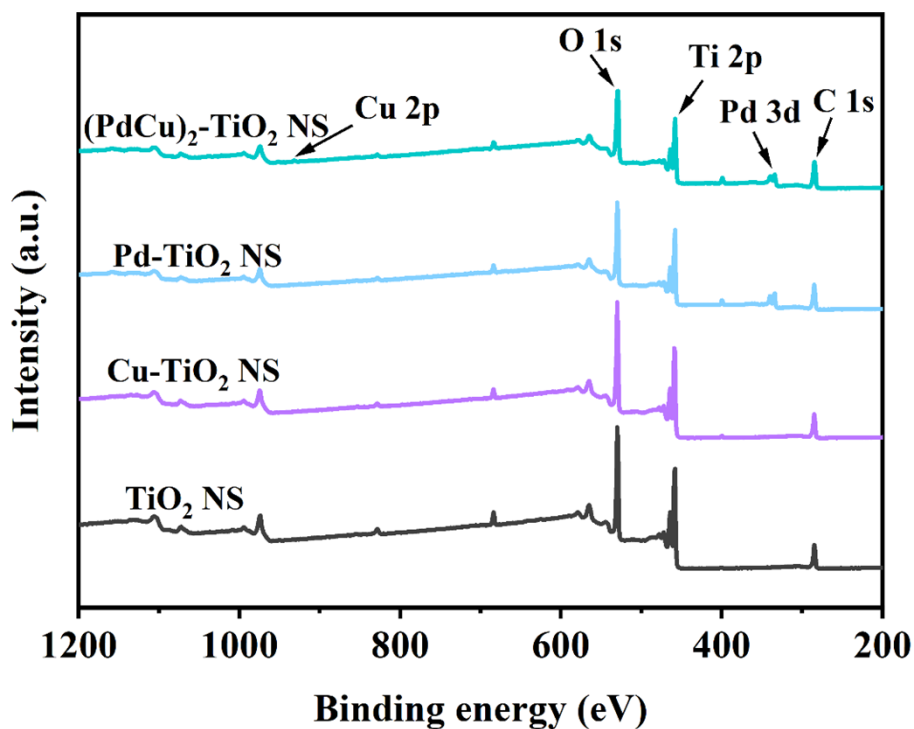

Figure S4. XPS full spectrum of the sample.

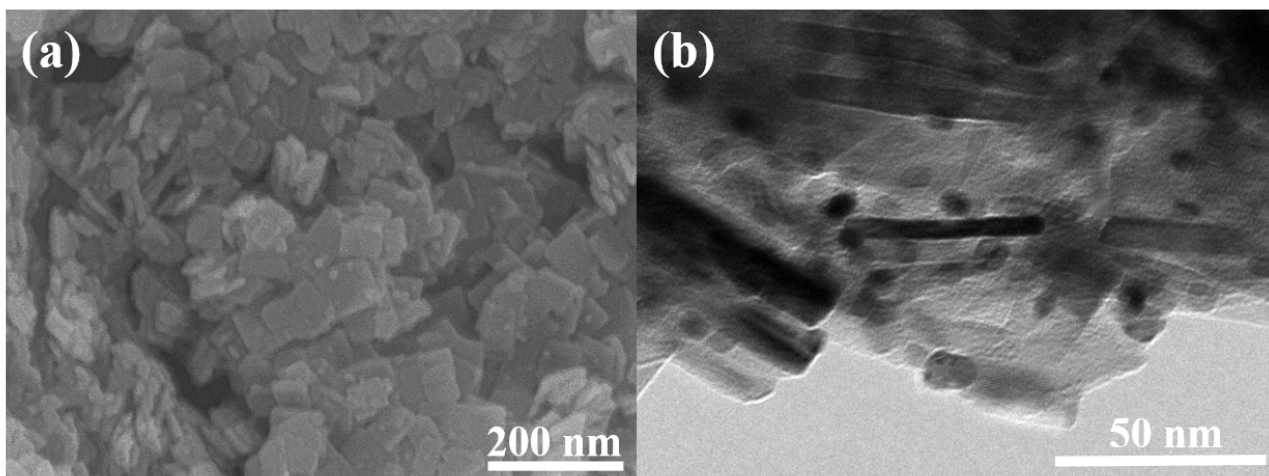

**Figure S5.** (a) SEM and (b) TEM images of the catalyst after cyclic testing.

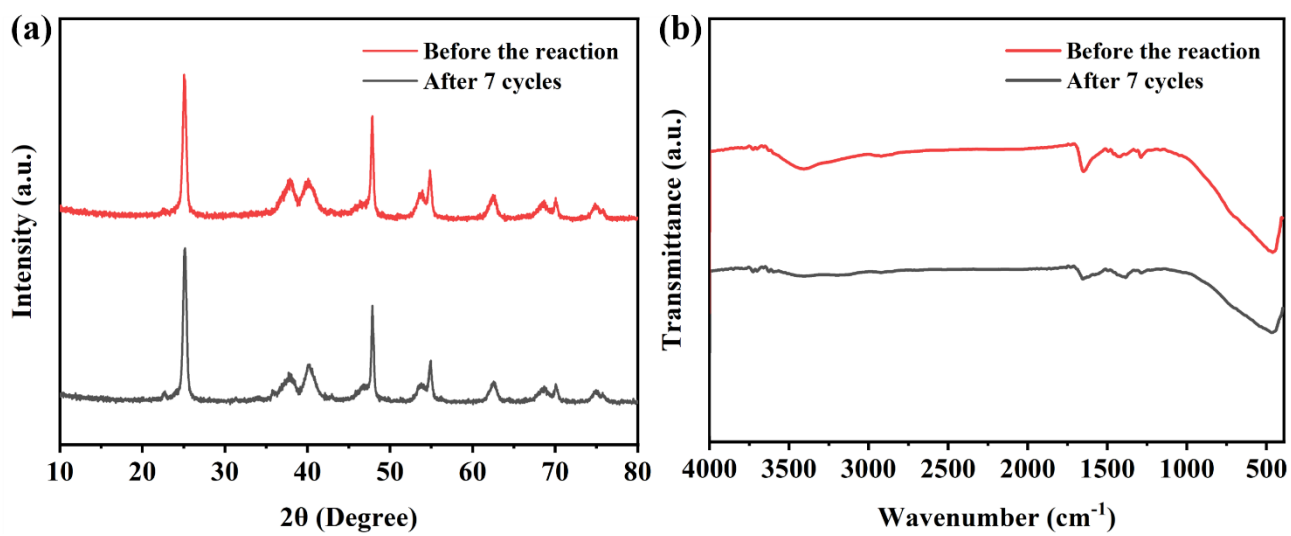

**Figure S6.** (a) XRD and (b) FT-IR spectra before and after catalyst reaction.



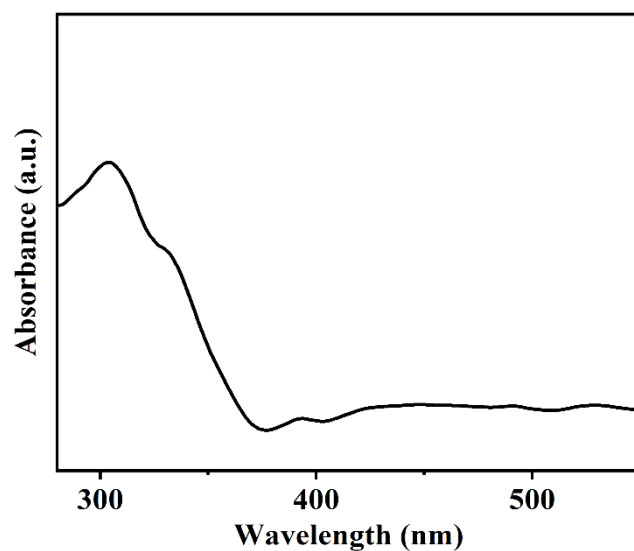

Figure S7. UV-vis spectra after 7 catalyst reactions.

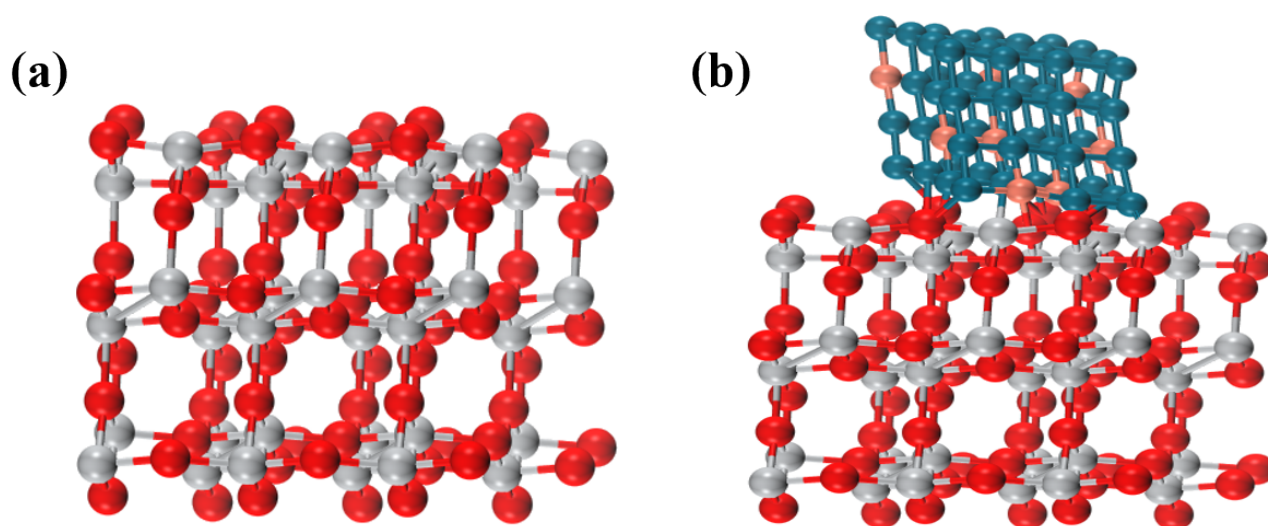

**Figure S8.** Structural models of optimized (a) TiO<sub>2</sub> and (b) PdCu-TiO<sub>2</sub>.

The optimized model of TiO<sub>2</sub> has 108 atoms, 36 Ti, 72 O, which is in accordance with the stoichiometric ratio. The optimized model for PdCu-TiO<sub>2</sub> has 172 atoms, 36 Ti, 72 O, 56 Pd and 8 Cu, which is also in accordance with the stoichiometric ratio.

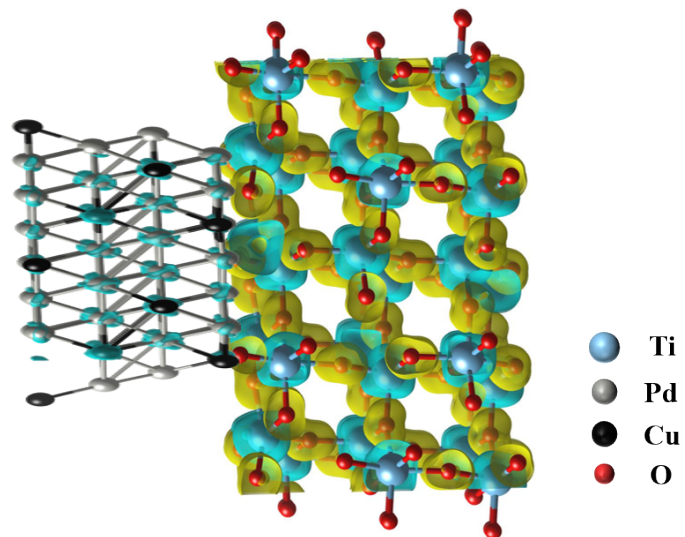

Figure S9. Charge density difference in PdCu-TiO<sub>2</sub> NS.

**Table S1.** Amount of reagents for the preparation of different samples.

|                                          | TiO <sub>2</sub> NS/mg | PVP/mg  | AA/mg | KBr/mg | PdCl <sub>2</sub> /ml | CuCl <sub>2</sub> ·2H <sub>2</sub> O/ml |
|------------------------------------------|------------------------|---------|-------|--------|-----------------------|-----------------------------------------|
| (PdCu) <sub>1</sub> -TiO <sub>2</sub> NS |                        | 343.64  | 60    | 150    | 1.55                  | 0.43                                    |
| (PdCu) <sub>2</sub> -TiO <sub>2</sub> NS |                        | 687.27  | 120   | 300    | 3.1                   | 0.85                                    |
| (PdCu) <sub>3</sub> -TiO <sub>2</sub> NS | 100                    | 1030.92 | 180   | 450    | 4.65                  | 1.28                                    |
| Pd-TiO <sub>2</sub> NS                   |                        | 687.27  | 120   | 300    | 3.55                  | -                                       |
| Cu-TiO <sub>2</sub> NS                   |                        | 687.27  | 120   | 300    | -                     | 6.82                                    |

**Table S2.** The mass fraction of metal atoms in the catalyst and the molar ratio between PdCu were determined by ICP-MS.

| Photocatalyst                         | Total mass share of Pd and Cu (%) | Molar ratio of Pd:Cu |
|---------------------------------------|-----------------------------------|----------------------|
| Pd-TiO <sub>2</sub>                   | 19.2                              | /                    |
| (PdCu) <sub>1</sub> -TiO <sub>2</sub> | 9.1                               | 6.83                 |
| (PdCu) <sub>2</sub> -TiO <sub>2</sub> | 17.9                              | 6.91                 |
| (PdCu) <sub>3</sub> -TiO <sub>2</sub> | 27.2                              | 6.86                 |
| Cu-TiO <sub>2</sub>                   | 0.05                              | /                    |



**Table S3.** Comparison of the performance of recent research photocatalysts.

| Photocatalysts                                        | Light sources                       | Reaction medium        | products        | production                                                             | Selectivity | Note                                                   | Ref       |
|-------------------------------------------------------|-------------------------------------|------------------------|-----------------|------------------------------------------------------------------------|-------------|--------------------------------------------------------|-----------|
|                                                       |                                     |                        |                 | yield<br>( $\mu\text{mol}\cdot\text{g}^{-1}\cdot\text{h}^{-1}$ )<br>1) |             |                                                        |           |
| (PdCu) <sub>2</sub> -TiO <sub>2</sub> NS              | 300 W Xe lamp                       | H <sub>2</sub> O vapor | CH <sub>4</sub> | 18.1                                                                   | 98.7%       | /                                                      | This work |
| Pt <sub>0.5</sub> Cu <sub>0.5</sub> /TiO <sub>2</sub> | 300 W Xe lamp                       | H <sub>2</sub> O vapor | CH <sub>4</sub> | 13.5                                                                   | ~97%        | Cumbersome process, long preparation cycle             | 1         |
| Cu/TiO <sub>2</sub>                                   | 300 W Xe lamp                       | H <sub>2</sub> O vapor | CO              | 15.3                                                                   | 95.9%       | Low CH <sub>4</sub> selectivity                        | 2         |
| Au-TiO <sub>2</sub>                                   | 300 W Xe lamp ( $\lambda < 420$ nm) | H <sub>2</sub> O vapor | CO              | 25.9                                                                   | 83%         | High cost, low CH <sub>4</sub> selectivity             | 3         |
| Ag-TiO <sub>2</sub> /TS-1                             | 300 W Xe lamp                       | H <sub>2</sub> O vapor | CO              | 6.8                                                                    | 85%         | Low CH <sub>4</sub> selectivity and yield              | 4         |
| Au@ZnS/3DOMm-TiO <sub>2</sub> -2                      | 300 W Xe lamp                       | H <sub>2</sub> O vapor | CH <sub>4</sub> | 33.2                                                                   | 91.5%       | High cost, cumbersome process                          | 5         |
| BT/ZIS                                                | 150 W Xe lamp (AM 1.5G filter)      | H <sub>2</sub> O+TEOA  | CO              | 71.6                                                                   | 87%         | Add sacrificial agent, low CH <sub>4</sub> selectivity | 6         |
| Pt <sub>1</sub> @CN                                   | 300 W Xe lamp (AM 1.5G filter)      | H <sub>2</sub> O vapor | CO              | 84.8                                                                   | ~100%       | Low CH <sub>4</sub> selectivity                        | 7         |

## Reference

1. X. Wang, H. Liao, W. Tan, W. Song, X. Li, J. Ji, X. Wei, C. Wu, C. Yin and Q. Tong, *ACS Applied Materials & Interfaces*, 2024, **16**, 22089-22101.
2. K. Zhu, Q. Zhu, M. Jiang, Y. Zhang, Z. Shao, Z. Geng, X. Wang, H. Zeng, X. Wu and W. Zhang, *Angewandte Chemie International Edition*, 2022, **61**, e202207600.
3. A. Wang, S. Wu, J. Dong, R. Wang, J. Wang, J. Zhang, S. Zhong and S. Bai, *Chemical Engineering Journal*, 2021, **404**, 127145.
4. Y. Sun, G. Li, Y. Gong, Z. Sun, H. Yao and X. Zhou, *Journal of Hazardous Materials*, 2021, **403**, 124019.
5. Y. Li, Y. Wei, J. Xiong, Z. Tang, Y. Wang, X. Wang, Z. Zhao and J. Liu, *Chemical Engineering Science*, 2024, **292**, 120017.
6. D. P. Kumar, K. H. Do, A. P. Rangappa, J. Lee, J. Wang, R. Boppella, M. Gopannagari, K. A. J. Reddy, D. A. Reddy and T. K. Kim, *Journal of Colloid and Interface Science*, 2023, **651**, 264-272.
7. S. Hu, P. Qiao, X. Liang, G. Ba, X. Zu, H. Hu, J. Ye and D. Wang, *Applied Catalysis B: Environment and Energy*, 2024, **346**, 123737.
